# Supplementary material for: Sequencing and Analysis of the Mediterranean Amphioxus (Branchiostoma lanceolatum) Transcriptome
Source: PubMed Central journal article supplement (PMC3348903; doi:10.1371/journal.pone.0036554), 2012-05-09
Supplement: pone.0036554.s001.pdf [file pone.0036554.s001.pdf]

| Class       | Gene family | Gene name |   |
|-------------|-------------|-----------|---|
| ANTP        | En          | En        | x |
|             | Gbx         | Gbx       | x |
|             | Mnx         | Mnxa      | x |
|             |             | Mnxb      | x |
|             | Evx         | Evxa      | x |
|             |             | Evxb      | x |
|             | Hox         | Hox1      | x |
|             |             | Hox2      | o |
|             |             | Hox3      | x |
|             |             | Hox4      | x |
|             |             | Hox5      | o |
|             |             | Hox6      | x |
|             |             | Hox7      | o |
|             |             | Hox8      | o |
|             |             | Hox9      | o |
|             |             | Hox10     | o |
|             |             | Hox11     | o |
|             |             | Hox12     | o |
|             |             | Hox13     | o |
|             |             | Hox14     | o |
|             |             | Hox15     | o |
|             | ParaHox     | Gsx       | o |
|             |             | Xlox      | o |
|             |             | Cdx       | x |
|             | Meox        | Mox       | x |
|             | Ro          | Ro        | o |
|             | Barh        | Barh      | x |
|             | Barx        | Barx      | x |
|             | Bari        | Bari      | o |
|             | Bsx         | Bsx       | o |
|             | Dbx         | Dbx       | x |
|             | Dlx         | Dll       | x |
|             | Emx         | Emxa      | x |
|             |             | Emxb      | x |
|             | Hlx         | Hlx       | o |
|             | Hx          | Hx        | x |
|             | Msx         | Msx       | x |
|             | Msxlx       | Msxlx     | o |
|             | Nk2.1/Scro  | Nkx2-1    | x |
|             | Nk2.2/Vnd   | Nkx2-2    | x |
|             | Hmx         | Hmx       | x |
|             | Nk6         | Nkx6      | x |
|             | Nk7         | Nkx7      | x |
|             | Noto        | Not       | x |
|             | Vax         | Vax       | o |
|             | Ventx       | Vent1     | x |
|             |             | Vent2     | x |
|             | Lcx         | Lcx       | x |
|             | Lb          | Lbx       | x |
|             | Nk1/Slou    | Nkx1a     | o |
| Nkx1b       |             | o         |   |
| Nk3/Bap     | Nkx3        | x         |   |
| Nk4/Tin/Csx | Csx         | x         |   |
| Tlx         | Tlx         | x         |   |
| Nedx        | Nedxa       | x         |   |
|             | Nedxb       | x         |   |
| Abox        | Abox        | o         |   |
| Ankx        | Ankx        | x         |   |
| Hhex        | Hhex        | x         |   |

| Class | Gene family | Gene name |          |   |
|-------|-------------|-----------|----------|---|
| PRD   | Pax1/9      | Pax1/9    | x        |   |
|       | Pax2/5/8    | Pax2/5/8  | x        |   |
|       | Pax3/7      | Pax3/7    | x        |   |
|       | Pax4/6      | Pax6      | x        |   |
|       | Pon         | Pon       | o        |   |
|       | Arx         | Arx       | o        |   |
|       | Alx         | Alx       | x        |   |
|       | Vsx         | Vsx       | x        |   |
|       | Isx         | Isx       | x        |   |
|       | Dmbx        | Dmbx      | x        |   |
|       | Drgx        | Drgx      | o        |   |
|       | Gsc         | Gsc       | x        |   |
|       | APrDA       | Aprd1     | o        |   |
|       | APrDB       | Aprd2     | x        |   |
|       | APrDC       | Aprd3     | o        |   |
|       | APrDD       | Aprd4     | x        |   |
|       |             | Aprd5     | x        |   |
|       | APrDE       | Aprd6     | x        |   |
|       | Otp         | Otp       | x        |   |
|       | Otx         | Otx       | x        |   |
|       | Phox        | Phox      | o        |   |
|       | Prop        | Prop      | o        |   |
|       | Pitx        | Pitx      | x        |   |
|       | Prrx        | Prrx      | o        |   |
|       | Repo        | Repo      | o        |   |
|       | Rax         | Rax       | o        |   |
|       | Shox        | UncxA     | x        |   |
|       |             | UncxB     | x        |   |
|       |             | UncxC     | o        |   |
|       | Hopx        | Hopx      | x        |   |
|       | CUT         | Onecut    | Onecut   | x |
|       |             | Cux       | Cux      | x |
|       |             | Cmp       | Compass  | x |
|       |             | Acut      | Acut     | x |
|       | LIM         | Lhx2/9    | Lhx2/9-a | x |
|       |             |           | Lhx2/9-b | o |
|       |             | Isl       | Isl      | x |
|       |             | Lhx1/5    | Lhx1/5   | x |
|       |             | Lhx3/4    | Lhx3/4   | x |
|       |             | Lhx6/8    | Lhx6/8   | o |
| Lmx   | Lmx         | x         |          |   |
| PROS  | Prox        | Prox      | x        |   |
| SINE  | Six1/2      | Six1/2    | x        |   |
|       | Six3/6      | Six3/6    | x        |   |
|       | Six4/5      | Six4/5    | x        |   |
| TALE  | Irx         | IrxA      | x        |   |
|       |             | IrxB      | x        |   |
|       |             | IrxC      | x        |   |
|       | Meis        | Meis      | x        |   |
|       | Mkx         | Mkx       | x        |   |
|       | Atale       | Atale     | o        |   |
|       | Pbx         | Pbx       | x        |   |
|       | Pknox       | Pknox     | x        |   |
| Tgif  | Tgif        | x         |          |   |

| Class | Gene family | Gene name |   |
|-------|-------------|-----------|---|
| ZF    | Zfhx        | Zfhx      | x |
|       | Azfh        | Azfh      | x |
|       | Zeb         | Zeb       | x |
|       | Tshz        | Tshz      | x |
|       | Zhx         | Zhx       | x |
| CERS  | Cers        | Cers      | x |
| POU   | POU1        | POU1      | o |
|       | POU2        | POU2      | x |
|       | POU3        | POU3      | x |
|       | POU4        | POU4      | x |
|       | POU6        | POU6      | x |
|       | POU3        | POU3L     | x |
|       | Hdx         | Hdx       | x |
| HNF   | HNF1        | Tcf       | x |
|       | Hmbox       | Hmbox1A   | x |
|       |             | Hmbox1B   | x |
| Ahnfx | Ahnf        | x         |   |
| Other | Ahbx        | Ahbx1     | x |
|       | Muxa        | Muxa      | o |
|       | Muxa        | Muxb      | x |

Additional table 1
