# Supplementary material for: Sequencing and Analysis of the Mediterranean Amphioxus (Branchiostoma lanceolatum) Transcriptome
Source: PubMed Central journal article supplement (PMC3348903; doi:10.1371/journal.pone.0036554), 2012-05-09
Supplement: pone.0036554.s002.pdf [file pone.0036554.s002.pdf]

A

| Class   | Gene name |   |
|---------|-----------|---|
| FoxA    | FoxAa     | x |
|         | FoxAb     | x |
| FoxB    | FoxB      | x |
| FoxAB   | FoxABA    | o |
|         | FoxABB    | o |
| FoxC    | FoxC      | x |
| FoxD    | FoxD      | x |
| FoxE    | FoxEaA    | x |
|         | FoxEaB    | x |
|         | FoxEb     | x |
|         | FoxEd     | x |
|         | FoxEe     | x |
|         | FoxEc     | x |
|         | FoxEf     | x |
|         | FoxEg     | x |
|         | FoxEh     | x |
|         | FoxEi     | x |
| FoxF    | FoxF      | x |
| FoxG    | FoxG      | x |
| FoxH    | FoxHA     | x |
|         | FoxHB     | x |
| FoxI    | FoxI      | x |
| FoxJ1   | FoxJ1A    | x |
|         | FoxJ1B    | x |
| FoxJ2/3 | FoxJ2/3   | x |
| FoxK    | FoxKA     | x |
|         | FoxKB     | x |
| FoxL1   | FoxL1     | x |
| FoxL2   | FoxL2A    | o |
|         | FoxL2B    | x |
| FoxM    | FoxMA     | x |
| FoxN1/4 | FoxN1/4bA | x |
|         | FoxN1/4bB | x |
|         | FoxN1/4aA | x |
|         | FoxN1/4aB | x |
| Fox2/3  | FoxN2/3A  | x |
|         | FoxN2/3B  | x |
| FoxO    | FoxOA     | o |
|         | FoxOB     | o |
| FoxP    | FoxPA     | x |
|         | FoxPB     | x |
| FoxQ1   | FoxQ1     | x |
| FoxQ2   | FoxQ2aA   | x |
|         | FoxQ2aB   | x |
|         | FoxQ2bA   | x |
|         | FoxQ2bB   | x |
|         | FoxQ2c    | x |
| Fox1    | Fox1A     | o |
|         | Fox1B     | x |

B

|      | NR group | Gene name |         |   |
|------|----------|-----------|---------|---|
| NR0  | NR0B     | NR0B      | x       |   |
|      | NR1A     | TR        | x       |   |
|      | NR1B     | RAR       | x       |   |
|      | NR1C     | PPAR      | o       |   |
|      | NR1D     | REV-ERB   | x       |   |
|      | NR1F     | ROR       | x       |   |
|      | NR1H     | NR1H-1    | x       |   |
|      | NR1H     | NR1H-2    | x       |   |
|      | NR1H     | NR1H-3    | x       |   |
|      | NR1H     | NR1H-4    | o       |   |
| NR1  | NR1H     | NR1H-5    | x       |   |
|      | NR1H     | NR1H-6    | x       |   |
|      | NR1H     | NR1H-7    | x       |   |
|      | NR1H     | NR1H-8    | x       |   |
|      | NR1H     | NR1H-9    | x       |   |
|      | NR1H     | NR1H-10   | x       |   |
|      | NR2      | NR2A      | HNF4    | x |
|      |          | NR2B      | RXR     | x |
|      |          | NR2C      | TR2/4   | x |
|      |          | NR2D      | COUP-TF | x |
| NR2E |          | TLX       | o       |   |
| NR2E |          | PNR       | o       |   |
| NR3  | NR2E     | NR2E      | x       |   |
|      | NR3A     | ER        | x       |   |
|      | NR3B     | ERR       | x       |   |
| NR4  | NR3C     | SR        | o       |   |
|      | NR4A     | NR4A      | x       |   |
| NR5  | NR5A     | NR5A      | o       |   |
|      | NR5B     | NR5B      | o       |   |
| NR6  | NR6A     | GCNF      | x       |   |
|      | NRa      | NRa       | x       |   |
|      | NRb      | NRb       | o       |   |
|      | NRc      | NRc       | x       |   |

C

|      | Gene name  |   |
|------|------------|---|
| Fgf  | Fgf1/2     | o |
|      | Fgf8/17/18 | x |
|      | Fgf9/16/20 | o |
|      | FgfA       | o |
|      | FgfB       | o |
|      | FgfC       | x |
|      | FgfD       | o |
| FgfE | o          |   |

Additional table 2
